# Supplementary material
Source: HighWire-hosted journal article supplement (http://d39mdc1iz3oyyf.cloudfront.net/highwire/filestream/113571/field_highwire_adjunct_files/0/supplementary_tables-figures.pdf)

Table S1a – *TP53* mutation distribution by effect and type grouped into categories for predicted effect on the protein

| <b>Biomarker</b> | <b>Mutation effect</b>                            | <b>n</b> | <b>%</b> |
|------------------|---------------------------------------------------|----------|----------|
| <i>TP53</i>      | Wild Type                                         | 129      | 51.2     |
|                  | Mutated                                           | 121      | 48.8     |
| Conservation     | 0 – Silent (and WT)                               | 133      | 54.1     |
|                  | 1 – Deleterious                                   | 78       | 31.7     |
|                  | 2 – Neutral                                       | 1        | 0.4      |
|                  | 4 – Non missense                                  | 34       | 13.8     |
| Transactivation  | 0 – Silent MT or WT                               | 133      | 54.1     |
|                  | 1 – Non Functional                                | 73       | 29.7     |
|                  | 2 – Functional/Partially functional               | 6        | 2.4      |
|                  | 4 – NA                                            | 34       | 13.8     |
| Structure        | 0 – Silent (and WT)                               | 133      | 54.7     |
|                  | 1 – Missense mutations in DNA-binding domain      | 44       | 18.1     |
|                  | 2 – Missense mutations outside DNA-binding domain | 32       | 13.2     |
|                  | 4 – Non-missense                                  | 34       | 14.0     |
| Type             | 0 – Wild Type                                     | 130      | 53.3     |
|                  | 1 – CpGs sites                                    | 6        | 2.5      |
|                  | 2 – A:T > xxx                                     | 24       | 9.8      |
|                  | 3 – All G>T                                       | 36       | 14.8     |
|                  | 4 – G>A or G>C not a CpG sites                    | 27       | 11.1     |
|                  | 5 - Other                                         | 21       | 8.6      |
| Deleterious      | 0 – Wild type and silent mutations                | 133      | 53.8     |
|                  | 1 – Deleterious                                   | 82       | 33.2     |
|                  | 2 – Non-deleterious                               | 32       | 13.0     |

<sup>s</sup> Hardy Weinberg equilibrium test validated

| <b>Variable (missing)</b>     | <b>Items</b>   | <b>Wild type (n = 130)</b> |          | <b>3 – All G &gt; T (n = 36)</b> |          | <b>P value<sup>s</sup></b> |
|-------------------------------|----------------|----------------------------|----------|----------------------------------|----------|----------------------------|
|                               |                | <b>n</b>                   | <b>%</b> | <b>n</b>                         | <b>%</b> |                            |
| Gender                        | Male           | 108                        | 83.1     | 30                               | 83.3     | 0.78                       |
|                               | Female         | 22                         | 16.9     | 6                                | 16.7     |                            |
| Age                           | < 60           | 41                         | 31.5     | 15                               | 41.7     | 0.16                       |
|                               | [60 – 65]      | 16                         | 12.3     | 7                                | 19.4     |                            |
|                               | [65 – 70]      | 24                         | 18.5     | 9                                | 25.0     |                            |
|                               | ≥ 70           | 49                         | 37.7     | 5                                | 13.9     |                            |
| Smoking status * (1)          | Current smoker | 78                         | 60.5     | 25                               | 69.4     | 0.60                       |
|                               | Former smoker  | 44                         | 34.1     | 10                               | 27.8     |                            |
|                               | Never smoker   | 7                          | 5.4      | 1                                | 2.8      |                            |
| Age at smoking initiation (2) | < 16           | 51                         | 41.8     | 14                               | 41.2     | 0.29                       |
|                               | [16 – 18]      | 20                         | 16.4     | 3                                | 8.8      |                            |
|                               | [18 – 20]      | 22                         | 18.0     | 4                                | 11.8     |                            |
|                               | ≥ 20           | 29                         | 23.8     | 13                               | 38.2     |                            |
| Smoking duration (3) in years | < 30           | 15                         | 12.4     | 6                                | 17.7     | 0.67                       |
|                               | [30 – 40]      | 36                         | 29.8     | 11                               | 32.4     |                            |
|                               | [40 – 50]      | 33                         | 27.3     | 12                               | 35.3     |                            |
|                               | ≥ 50           | 37                         | 30.6     | 5                                | 14.7     |                            |

|                                |                     |    |      |    |      |      |
|--------------------------------|---------------------|----|------|----|------|------|
| Packs year (3)                 | < 20                | 20 | 15.6 | 4  | 11.4 | 0.24 |
|                                | [20 – 40]           | 41 | 32.0 | 18 | 51.4 |      |
|                                | [40 – 50]           | 22 | 17.2 | 5  | 14.3 |      |
|                                | ≥ 50                | 45 | 35.2 | 8  | 22.9 |      |
| Cigarette type (4)             | Filter              | 53 | 44.2 | 16 | 45.7 | 0.78 |
|                                | Mixed               | 38 | 31.7 | 9  | 25.7 |      |
|                                | Non Filter & Rolled | 29 | 24.2 | 10 | 28.6 |      |
| Years since quit smoking** (1) | [2 – 6]             | 9  | 20.5 | 1  | 10.0 | 0.54 |
|                                | [6 – 13]            | 14 | 31.8 | 3  | 30.0 |      |
|                                | [13 – 20 ]          | 8  | 18.2 | 5  | 50.0 |      |
|                                | ≥ 20                | 13 | 29.6 | 1  | 10.0 |      |

\* Current smokers were smokers in the last 2 years before interview

\*\* Among patients who ever smoked and quit (former smokers)

\$ Mantel Haenzsel Chi square controlling for centre

**Table S1b – Association between *TP53* mutation and clinical variables**

| Variable (missing)         | Items                   | Wild type (n = 129) |      | Mutated (n = 121) |      | P value <sup>\$</sup> |
|----------------------------|-------------------------|---------------------|------|-------------------|------|-----------------------|
|                            |                         | n                   | %    | n                 | %    |                       |
| Gender                     | Male                    | 107                 | 82,9 | 103               | 85,1 | 0.8936                |
|                            | Female                  | 22                  | 17,1 | 18                | 14,9 |                       |
| Age                        | < 60                    | 40                  | 31   | 49                | 40,5 | 0.6034                |
|                            | [60-65]                 | 49                  | 38   | 33                | 27,3 |                       |
|                            | [65-70]                 | 16                  | 12,4 | 14                | 11,6 |                       |
|                            | ≥ 70                    | 24                  | 18,6 | 25                | 20,7 |                       |
| Education level (10)       | No/Primary Level        | 93                  | 76,2 | 88                | 74,6 | 0.7154                |
|                            | High educated           | 29                  | 23,8 | 30                | 25,4 |                       |
| Histology                  | Adenocarcinoma          | 85                  | 65,9 | 48                | 39,7 | <.0001                |
|                            | Squamous Cell Carcinoma | 41                  | 31,8 | 69                | 57   |                       |
|                            | Others                  | 3                   | 2,3  | 4                 | 3,3  |                       |
| Asbestos exposure (2)      | Non                     | 100                 | 78,7 | 91                | 75,2 | 0.8007                |
|                            | Yes                     | 27                  | 21,3 | 30                | 24,8 |                       |
| pT (1)                     | T1                      | 39                  | 30,5 | 37                | 30,6 | 0.9810                |
|                            | T2                      | 76                  | 59,4 | 74                | 61,2 |                       |
|                            | T3                      | 8                   | 6,3  | 7                 | 5,8  |                       |
|                            | T4                      | 5                   | 3,9  | 3                 | 2,5  |                       |
| pN (1)                     | N0                      | 89                  | 69,5 | 84                | 69,4 | 0.3696                |
|                            | N1                      | 30                  | 23,4 | 35                | 28,9 |                       |
|                            | N2                      | 2                   | 1,6  | 0                 | 0    |                       |
|                            | NX                      | 7                   | 5,5  | 2                 | 1,7  |                       |
| Past pulmonary illness (2) | No                      | 50                  | 39,4 | 60                | 49,6 | 0.1505                |
|                            | Yes                     | 77                  | 60,6 | 61                | 50,4 |                       |
| Smoking status * (1)       | Current smoker          | 77                  | 60,2 | 75                | 62   | 0.8287                |
|                            | Former smoker           | 44                  | 34,4 | 42                | 34,7 |                       |
|                            | Never smoker            | 7                   | 5,5  | 4                 | 3,3  |                       |

\$ Mantel Haenzsel Chi square controlling for centre

**Table S1c - Association between *TP53* mutation and smoking variables**

| Variable (missing)                     | Items               | Wild type (n = 129) |      | Mutated (n = 121) |      | P value <sup>§</sup> |
|----------------------------------------|---------------------|---------------------|------|-------------------|------|----------------------|
|                                        |                     | n                   | %    | n                 | %    |                      |
| Smoking duration (2) in years          | < 30                | 15                  | 12.5 | 20                | 17.2 | 0.3690               |
|                                        | [30-40]             | 35                  | 29.2 | 35                | 30.2 |                      |
|                                        | [40-50]             | 33                  | 27.5 | 39                | 33.6 |                      |
|                                        | ≥ 50                | 37                  | 30.8 | 22                | 19.0 |                      |
| Age at smoking initiation (1)          | < 16                | 50                  | 41.3 | 41                | 35.3 | 0.7771               |
|                                        | [16-18]             | 20                  | 16.5 | 21                | 18.1 |                      |
|                                        | [18-20]             | 22                  | 18.2 | 26                | 22.4 |                      |
|                                        | ≥ 20                | 29                  | 24.0 | 28                | 24.1 |                      |
| Packs year (3)                         | < 20                | 20                  | 15.8 | 18                | 15.0 | 0.7647               |
|                                        | [20-40]             | 41                  | 32.3 | 48                | 40.0 |                      |
|                                        | [40-50]             | 22                  | 17.3 | 22                | 18.3 |                      |
|                                        | ≥ 50                | 44                  | 34.7 | 32                | 26.7 |                      |
| Years since quit smoking **            | [2 – 6]             | 9                   | 20.5 | 4                 | 9.5  | 0.7084               |
|                                        | [6 – 13]            | 14                  | 31.8 | 14                | 33.3 |                      |
|                                        | [13 – 20]           | 8                   | 18.2 | 13                | 31.0 |                      |
|                                        | ≥ 20                | 13                  | 29.6 | 11                | 26.2 |                      |
| Cigarette type (4)                     | Filtered            | 52                  | 43.7 | 52                | 45.2 | 0.5528               |
|                                        | Mixed               | 38                  | 31.9 | 29                | 25.2 |                      |
|                                        | Non Filtered/Rolled | 29                  | 24.4 | 34                | 29.6 |                      |
| Family history of Lung/HN cancer (6)   | No Lung/HN cancer   | 96                  | 76,8 | 83                | 69,7 | 0.1620               |
|                                        | Lung/HN cancer      | 29                  | 23,2 | 36                | 30,3 |                      |
| Personal history of Lung/HN cancer (2) | No Lung/HN cancer   | 118                 | 92,9 | 107               | 88,4 | 0.4381               |
|                                        | Lung/HN cancer      | 9                   | 7,1  | 14                | 11,6 |                      |

\* Current smokers were smokers in the last 2 years before interview

\*\* Among patients who ever smoked and quit (former smoker)

§ Mantel Haenzsel Chi square controlling for centre

**Table S2a – Clinical risk factors of *TP53* mutation**

| Variable (missing)    | Items   | Wild type (n=135) |      | Mutated (n=124) |      | P**    |
|-----------------------|---------|-------------------|------|-----------------|------|--------|
|                       |         | n                 | %    | n               | %    |        |
| Gender (1)            | Female  | 21                | 15,7 | 19              | 15,3 | 0.9241 |
|                       | Male    | 113               | 84,3 | 105             | 84,7 |        |
| Age                   | <60     | 40                | 29,6 | 51              | 41,1 | 0.4672 |
|                       | [60-65] | 16                | 11,9 | 14              | 11,3 |        |
|                       | [65-70] | 25                | 18,5 | 24              | 19,4 |        |
|                       | ≥70     | 54                | 40   | 35              | 28,2 |        |
| Education age (22)    | <14     | 17                | 13,9 | 22              | 19,1 | 0.2665 |
|                       | [14-16] | 48                | 39,3 | 41              | 35,7 |        |
|                       | [16-18] | 19                | 15,6 | 25              | 21,7 |        |
|                       | ≥18     | 38                | 31,1 | 27              | 23,5 |        |
| Past cancer (6)       | No      | 112               | 85,5 | 96              | 78,7 | 0.1972 |
|                       | Yes     | 19                | 14,5 | 26              | 21,3 |        |
| Asbestos exposure (6) | No      | 90                | 68,7 | 84              | 68,9 | 0.6270 |
|                       | Unsure  | 14                | 10,7 | 8               | 6,6  |        |

|                                       |                         |     |      |    |      |                  |
|---------------------------------------|-------------------------|-----|------|----|------|------------------|
|                                       | Yes                     | 27  | 20,6 | 30 | 24,6 |                  |
| Past pulmonary illness (6)            | None                    | 51  | 38,9 | 59 | 48,4 | 0.2018           |
|                                       | At least one            | 80  | 61,1 | 63 | 51,6 |                  |
| Family history of Lung/HN cancer (10) | Lung/HNCancer           | 29  | 22,5 | 37 | 30,8 | 0.1103           |
|                                       | No Lung/HNCancer        | 100 | 77,5 | 83 | 69,2 |                  |
| Family history of cancer (10)         | Cancer                  | 62  | 48,1 | 66 | 55   | 0.1650           |
|                                       | No cancer               | 67  | 51,9 | 54 | 45   |                  |
| Smoking status (1)                    | Current Smoker          | 20  | 14,9 | 27 | 21,8 | 0.5288           |
|                                       | Former Smoker           | 106 | 79,1 | 93 | 75   |                  |
|                                       | Never Smoker            | 8   | 6    | 4  | 3,2  |                  |
| Cigarette type (10)                   | Filtered                | 52  | 43   | 53 | 45,7 | 0.6311           |
|                                       | Mixed                   | 39  | 32,2 | 30 | 25,9 |                  |
|                                       | Non Filtered/Rolled     | 30  | 24,8 | 33 | 28,4 |                  |
| Years since quit smoking (46)         | <1                      | 20  | 19,8 | 27 | 27   | 0.5433           |
|                                       | [1-2]                   | 18  | 17,8 | 21 | 21   |                  |
|                                       | [2-10]                  | 32  | 31,7 | 21 | 21   |                  |
|                                       | ≥10                     | 31  | 30,7 | 31 | 31   |                  |
| Smoking initiation age (7)            | <15                     | 30  | 24,4 | 27 | 23,1 | 0.5674           |
|                                       | [15-16]                 | 21  | 17,1 | 14 | 12   |                  |
|                                       | [16-18]                 | 21  | 17,1 | 22 | 18,8 |                  |
|                                       | ≥ 18                    | 51  | 41,5 | 54 | 46,2 |                  |
| Packs year (8)                        | <25                     | 34  | 26,2 | 29 | 24   | 0.5484           |
|                                       | [25-40]                 | 28  | 21,5 | 37 | 30,6 |                  |
|                                       | [40-55]                 | 34  | 26,2 | 27 | 22,3 |                  |
|                                       | ≥ 55                    | 34  | 26,2 | 28 | 23,1 |                  |
| Smoking duration (8)                  | <30                     | 24  | 18,5 | 23 | 19   | 0.3587           |
|                                       | [30-40]                 | 34  | 26,2 | 36 | 29,8 |                  |
|                                       | [40-50]                 | 33  | 25,4 | 39 | 32,2 |                  |
|                                       | ≥ 50                    | 39  | 30   | 23 | 19   |                  |
| <b>Histology</b>                      | Adenocarcinoma          | 91  | 67,4 | 48 | 38,7 | <b>&lt;.0001</b> |
|                                       | Squamous Cell Carcinoma | 43  | 31,9 | 69 | 55,6 |                  |
|                                       | Other                   | 1   | 0,7  | 7  | 5,6  |                  |
| pT (1)                                | T1                      | 41  | 30,6 | 37 | 29,8 | 0.9071           |
|                                       | T2                      | 79  | 59   | 77 | 62,1 |                  |
|                                       | T3                      | 9   | 6,7  | 7  | 5,6  |                  |
|                                       | T4                      | 5   | 3,7  | 3  | 2,4  |                  |
| pN (1)                                | N0                      | 94  | 70,1 | 85 | 68,5 | 0.9875           |
|                                       | N1, N2, Nx              | 40  | 30,9 | 39 | 31,5 |                  |
| Stage (1 + 9 Nx*)                     | Stage I                 | 90  | 70,9 | 82 | 67,2 | 0.6485           |
|                                       | Stage II                | 28  | 22,0 | 32 | 26,2 |                  |
|                                       | Stage III               | 9   | 7,1  | 8  | 6,6  |                  |

\* 9 stages unknown because of undetermined pN

\*\* Conditional logistic regression with centre stratification

**Table S2b - Clinical risk factors of *KRAS* mutation**

| Variable (missing)                     | Items               | Wild type<br>(n=203) |      | Mutated<br>(n=46) |      | P value          |
|----------------------------------------|---------------------|----------------------|------|-------------------|------|------------------|
|                                        |                     | n                    | %    | n                 | %    |                  |
| Gender                                 | Male                | 172                  | 84,7 | 38                | 82,6 | 0.81             |
|                                        | Female              | 31                   | 15,3 | 8                 | 17,4 |                  |
| Age                                    | < 60                | 73                   | 36   | 14                | 30,4 | 0.77             |
|                                        | [60-65]             | 26                   | 12,8 | 5                 | 10,9 |                  |
|                                        | [65-70]             | 38                   | 18,7 | 12                | 26,1 |                  |
|                                        | ≥ 70                | 66                   | 32,5 | 15                | 32,6 |                  |
| Past pulmonary illness (2)             | No                  | 88                   | 43,6 | 21                | 46,7 | 0.77             |
|                                        | Yes                 | 114                  | 56,4 | 24                | 53,3 |                  |
| Asbestos exposure (2)                  | Non                 | 154                  | 76,2 | 36                | 80   | 0.82             |
|                                        | Yes                 | 48                   | 23,8 | 9                 | 20   |                  |
| pN (1)                                 | N0                  | 140                  | 69,3 | 33                | 71,7 | 0.60             |
|                                        | N1, N2, NX          | 62                   | 30,7 | 13                | 28,3 |                  |
| pT (1)                                 | T1                  | 68                   | 33,7 | 9                 | 19,6 | 0.10             |
|                                        | T2, T3, T4          | 134                  | 66,3 | 37                | 80,4 |                  |
| Histology                              | SCC / Others        | 110                  | 54,2 | 5                 | 10,9 | <b>&lt;.0001</b> |
|                                        | ADK                 | 93                   | 45,8 | 41                | 89,1 |                  |
| Smoking status * (1)                   | Current smoker      | 128                  | 63,4 | 24                | 52,2 | 0.08             |
|                                        | Former smoker       | 64                   | 31,7 | 21                | 45,7 |                  |
|                                        | Never smoker        | 10                   | 5    | 1                 | 2,2  |                  |
| Smoking duration (2) in years          | < 30                | 27                   | 14.1 | 9                 | 20.0 | 0.29             |
|                                        | [30-40]             | 54                   | 28.3 | 14                | 31.1 |                  |
|                                        | [40-50]             | 63                   | 33.0 | 10                | 22.2 |                  |
|                                        | ≥ 50                | 47                   | 24.6 | 12                | 26.7 |                  |
| Age at smoking initiation              | < 16                | 75                   | 39.1 | 17                | 37.8 | 0.95             |
|                                        | [16-18]             | 32                   | 16.7 | 9                 | 20.0 |                  |
|                                        | [18-20]             | 36                   | 18.8 | 9                 | 20.0 |                  |
|                                        | ≥ 20                | 49                   | 25.5 | 10                | 22.2 |                  |
| Packs year (1)                         | < 20                | 28                   | 13.9 | 10                | 21.7 | 0.64             |
|                                        | [20-40]             | 74                   | 36.8 | 15                | 32.6 |                  |
|                                        | [40-50]             | 36                   | 17.9 | 8                 | 17.4 |                  |
|                                        | ≥ 50                | 63                   | 31.3 | 13                | 28.3 |                  |
| Years since quit smoking **            | [2 – 6]             | 11                   | 17.2 | 2                 | 9.5  | 0.71             |
|                                        | [6 – 13]            | 22                   | 34.4 | 6                 | 28.6 |                  |
|                                        | [13 – 20]           | 15                   | 23.4 | 5                 | 23.8 |                  |
|                                        | ≥ 20                | 16                   | 25.0 | 8                 | 38.1 |                  |
| Cigarette type (4)                     | Filtered            | 79                   | 42   | 24                | 53,3 | 0.23             |
|                                        | Mixed               | 58                   | 30,9 | 9                 | 20   |                  |
|                                        | Non Filtered/Rolled | 51                   | 27,1 | 12                | 26,7 |                  |
| Family history of Lung/HN cancer (5)   | No Lung/HN cancer   | 146                  | 73,4 | 33                | 73,3 | 0.92             |
|                                        | Lung/HN cancer      | 53                   | 26,6 | 12                | 26,7 |                  |
| Personal history of Lung/HN cancer (2) | No Lung/HN cancer   | 183                  | 90,6 | 41                | 91,1 | 0.49             |
|                                        | Lung/HN cancer      | 19                   | 9,4  | 4                 | 8,9  |                  |

\* Current smoker were smoker in the last 2 years before interview

\*\* Among patients who ever smoked and quit (Former smoker)

§ Mantel Haenzsel Chi square controlling for centre

**Table S2c - Clinical risk factors of *EGFR* mutation (on 120 ADC patients)**

| Variable (missing)                   | Items               | Wild type<br>(n=113) |      | Mutated<br>(n=17) |      | P value       |
|--------------------------------------|---------------------|----------------------|------|-------------------|------|---------------|
|                                      |                     | n                    | %    | n                 | %    |               |
| Gender                               | Male                | 92                   | 81.4 | 11                | 64.7 | 0.35          |
|                                      | Female              | 21                   | 18.6 | 6                 | 35.3 |               |
| Age                                  | < 60                | 41                   | 36.3 | 5                 | 29.4 | 0.21          |
|                                      | [60-65]             | 15                   | 13.3 | 2                 | 11.8 |               |
|                                      | [65-70]             | 19                   | 16.8 | 6                 | 35.3 |               |
|                                      | ≥ 70                | 38                   | 33.6 | 4                 | 23.5 |               |
| Past pulmonary illness               | No                  | 55                   | 48.7 | 8                 | 47.1 | 0.72          |
|                                      | Yes                 | 58                   | 51.3 | 9                 | 52.9 |               |
| Asbestos exposure                    | Non                 | 89                   | 78.8 | 14                | 82.4 | 0.93          |
|                                      | Yes                 | 24                   | 21.2 | 3                 | 17.7 |               |
| pN (1)                               | N0                  | 83                   | 73.5 | 11                | 68.8 | 0.95          |
|                                      | N1, N2, NX          | 30                   | 26.6 | 5                 | 31.3 |               |
| pT (1)                               | T1                  | 36                   | 31.9 | 5                 | 31.3 | 0.87          |
|                                      | T2, T3, T4          | 77                   | 68.1 | 11                | 68.8 |               |
| Smoking status*                      | Current smoker      | 64                   | 56.6 | 8                 | 47.1 | 0.11          |
|                                      | Former smoker       | 43                   | 38.1 | 5                 | 29.4 |               |
|                                      | Never smoker        | 6                    | 5.3  | 4                 | 23.5 |               |
| Smoking duration (1)<br>In years     | < 30                | 21                   | 19.8 | 4                 | 30.8 | 0.49          |
|                                      | [30-40]             | 33                   | 31.1 | 2                 | 15.4 |               |
|                                      | [40-50]             | 29                   | 27.4 | 3                 | 23.1 |               |
|                                      | ≥ 50                | 23                   | 21.7 | 4                 | 30.8 |               |
| Age at smoking initiation            | ≥ 16                | 59                   | 55.1 | 8                 | 61.5 | 0.87          |
|                                      | < 16                | 48                   | 44.9 | 5                 | 38.5 |               |
| Packs year (1)                       | ≤ 40                | 61                   | 54.5 | 13                | 76.5 | 0.15          |
|                                      | > 40                | 51                   | 45.5 | 4                 | 23.5 |               |
| Years since quit smoking **          | ≥ 13                | 24                   | 55.8 | 3                 | 60.0 | 0.96          |
|                                      | < 13                | 19                   | 44.2 | 2                 | 40.0 |               |
| Cigarette type (3)                   | Filtered            | 48                   | 45.7 | 5                 | 41.7 | 0.97          |
|                                      | Mixed               | 31                   | 29.5 | 4                 | 33.3 |               |
|                                      | Non Filtered/Rolled | 26                   | 24.8 | 3                 | 25.0 |               |
| Family history of Lung/HN cancer (2) | No Lung/HN cancer   | 80                   | 71.4 | 10                | 62.5 | 0.34          |
|                                      | Lung/HN cancer      | 32                   | 28.6 | 6                 | 37.5 |               |
| Personal history of Lung/HN cancer   | No Lung/HN cancer   | 103                  | 91.2 | 16                | 94.1 | 0.79          |
|                                      | Lung/HN cancer      | 10                   | 8.9  | 1                 | 5.9  |               |
| Gender / Smoking status              | Others              | 109                  | 96.5 | 13                | 76.5 | <b>0.0067</b> |
|                                      | Never smoker female | 4                    | 3.5  | 4                 | 23.5 |               |

\* Current smoker were smoker in the last 2 years before interview

\*\* Among patients who ever smoked and quit (Former smoker)

§ Mantel Haenzsel Chi square controlling for centre

**Table S3 - Association between *TP53* mutation and P53 expression**

| P53 Expression score* | TP53 Mutation |               | Total         |
|-----------------------|---------------|---------------|---------------|
|                       | Wild Type     | Mutated       |               |
| (0,1,2)               | 87<br>37.8 %  | 43<br>18.7 %  | 130<br>56.5 % |
| 3                     | 29<br>12.6 %  | 71<br>30.9 %  | 100<br>43.5 % |
| <b>Total</b>          | 116<br>50.4 % | 114<br>49.6 % | 230<br>100 %  |

Mantel Haenzel Chi square controlling for centre: P<.0001

\*: p53 immunostaining was expressed as a score summing up the results for intensity and distribution as follows: sum of 0, no staining (score 0); sum of 1 to 3, slight staining (score 1); sum of 4 to 5, moderate staining (score 2); and sum of 6 to 7, marked staining (score 3).

**Table S4 – Clinical risk factors of disease progression**

| Variable (missing)                    | Items                      | DF (n=162) |             | PD (n=99) |             | P*            |
|---------------------------------------|----------------------------|------------|-------------|-----------|-------------|---------------|
|                                       |                            | n          | %           | n         | %           |               |
| Gender (1)                            | Female                     | 23         | 14,2        | 18        | 18,4        | 0.1285        |
| Age                                   | > 65                       | 81         | 50          | 51        | 51,5        | 0.5066        |
| Education duration (22) in years      | > 16                       | 54         | 35,8        | 37        | 41,6        | 0.7591        |
| Professional exposure (6)             | Asbestos                   | 35         | 22          | 21        | 21,9        | 0.5629        |
| Past pulmonary illness (6)            | At least one               | 83         | 52,2        | 61        | 63,5        | 0.0991        |
| Family history of HN/Lung cancer (10) | HN/Lung cancer             | 44         | 28          | 22        | 23,4        | 0.4807        |
| Family history of cancer (10)         | Any cancer                 | 79         | 50,3        | 47        | 50          | 0.7761        |
| Smoking status (1)                    | Current smoker             | 36         | 22,2        | 13        | 13,3        | 0.0634        |
| Cigarette type (10)                   | Non Filtered               | 82         | 55,4        | 52        | 56,5        | 0.7210        |
| Years since quit smoking              | < 5                        | 68         | 42          | 43        | 43,4        | 0.7059        |
| Age at smoking initiation             | < 16 years old             | 74         | 45,7        | 37        | 37,4        | 0.5271        |
| Packs year (8)                        | > 40                       | 79         | 50,3        | 42        | 43,3        | 0.1196        |
| <b>Smoking duration ( 8) in years</b> | <b>&gt;40</b>              | <b>88</b>  | <b>56,1</b> | <b>42</b> | <b>43,3</b> | <b>0.0224</b> |
| PLC Histology                         | Adenocarcinoma             | 89         | 54,9        | 54        | 54,5        | 0.5583        |
|                                       | Squamous Cell Carcinoma    | 70         | 43,2        | 40        | 40,4        | 0.4535        |
| <b>pT (1)</b>                         | T2, T3, T4 vs T0, T1       | 99         | 61,1        | 82        | 83,7        | <b>0.0014</b> |
| <b>pN (1)</b>                         | N1, N2, Nx vs N0           | 33         | 20,4        | 44        | 44,9        | <b>0.0006</b> |
| <b>Tumor Stage (1+ 9 Nx**)</b>        | Stages II & III vs Stage I | 34         | 21,4        | 42        | 45,2        | <b>0.0038</b> |

\* Fine & Gray hazard model in the setting of competing risk with centre stratification

\*\* 9 stages unknown because of undetermined pN

**Table S5 – Association between disease progression and predicted effect of *TP53* mutation on p53 protein or function.**

| Variable                | Item                             | DF  |      | PD |      | HR<br>(95% CI)     | P*   | Adj HR<br>(95% CI) | P <sup>§</sup> |
|-------------------------|----------------------------------|-----|------|----|------|--------------------|------|--------------------|----------------|
|                         |                                  | n   | %    | n  | %    |                    |      |                    |                |
| <b>TP53</b>             | Wild Type                        | 73  | 50   | 56 | 53,8 | 1                  | 0.51 | 1                  | 0.77           |
|                         | Mutated                          | 73  | 50   | 48 | 46,2 | 0.88 (0.59 – 1.30) |      | 0.94 (0.63 – 1.40) |                |
| Conservation            | Silent                           | 75  | 51,7 | 59 | 58,4 | 1                  | 0.32 | 1                  | 0.62           |
|                         | Deleterious                      | 45  | 31   | 33 | 32,7 | 0.91 (0.59 – 1.41) |      | 1.00 (0.64 – 1.55) |                |
|                         | Non missense                     | 25  | 17,2 | 9  | 8,9  | 0.58 (0.29 – 1.18) |      | 0.71 (0.35 – 1.45) |                |
| Transactivation         | Silent/ WT/ Functional           | 78  | 53,8 | 61 | 60,4 | 1                  | 0.32 | 1                  | 0.62           |
|                         | Non Functional                   | 42  | 29   | 31 | 30,7 | 0.91 (0.58 – 1.41) |      | 0.98 (0.63 – 1.52) |                |
|                         | Non missense                     | 25  | 17,2 | 9  | 8,9  | 0.58 (0.29 – 1.18) |      | 0.70 (0.34 – 1.43) |                |
| Structure               | Silent/ WT                       | 74  | 51,7 | 59 | 59   | 1                  | 0.46 | 1                  | 0.76           |
|                         | Missense in DNA-binding domain   | 24  | 16,8 | 20 | 20   | 0.94 (0.56 – 1.58) |      | 0.99 (0.59 – 1.66) |                |
|                         | Missense outside DNA-bind domain | 20  | 14   | 12 | 12   | 0.83 (0.44 – 1.55) |      | 0.86 (0.46 – 1.63) |                |
|                         | Non missense                     | 25  | 17,5 | 9  | 9    | 0.57 (0.28 – 1.16) |      | 0.69 (0.34 – 1.41) |                |
| Structure               | Silent/ WT/ Non missense         | 99  | 69,2 | 68 | 68   | 1                  | 0.93 | 1                  | 0.98           |
|                         | Missense                         | 44  | 30,8 | 32 | 32   | 0.98 (0.64 – 1.50) |      | 0.99 (0.65 – 1.52) |                |
| Type                    | Others                           | 128 | 88,9 | 80 | 80   | 1                  | 0.14 | 1                  | 0.11           |
|                         | All G > T                        | 16  | 11,1 | 20 | 20   | 1.45 (0.88 – 2.40) |      | 1.52 (0.92 – 2.51) |                |
| Deleterious             | Silent/ WT                       | 74  | 51,4 | 59 | 57,3 | 1                  | 0.65 | 1                  | 0.86           |
|                         | Deleterious                      | 50  | 34,7 | 32 | 31,1 | 0.83 (0.54 – 1.29) |      | 0.93 (0.59 – 1.44) |                |
|                         | Non deleterious                  | 20  | 13,9 | 12 | 11,7 | 0.82 (0.44 – 1.54) |      | 0.85 (0.45 – 1.61) |                |
| <b>KRAS</b>             | Wild Type                        | 122 | 84,7 | 81 | 77,1 | 1                  | 0.21 | 1                  | 0.43           |
|                         | Mutated                          | 22  | 15,3 | 24 | 22,9 | 1.35 (0.85 – 2.15) |      | 1.21 (0.75 – 1.94) |                |
| <b>KRAS/TP53</b>        | Otherwise                        | 142 | 97,9 | 98 | 93,3 | 1                  | 0.07 | 1                  | 0.22           |
|                         | Both Mutated                     | 3   | 2,1  | 7  | 6,7  | 2.08 (0.95 – 4.57) |      | 1.66 (0.74 – 3.76) |                |
| <b>KRAS/TP53</b>        | Otherwise                        | 53  | 36,6 | 39 | 37,5 | 1                  | 0.70 | 1                  | 0.83           |
|                         | At least one Mutated             | 92  | 63,4 | 65 | 62,5 | 0.93 (0.62 – 1.38) |      | 0.96 (0.64 – 1.44) |                |
| <b>EGFR<sup>E</sup></b> | Wild Type                        | 63  | 86,3 | 50 | 87,7 | 1                  | 0.57 | 1                  | 0.80           |
|                         | Mutated                          | 10  | 13,7 | 7  | 12,3 | 1.26 (0.56 – 2.83) |      | 1.12 (0.47 – 2.67) |                |



|                       |                            |    |      |    |      |                    |      |                    |      |
|-----------------------|----------------------------|----|------|----|------|--------------------|------|--------------------|------|
| <b>P53 Expression</b> | 0, 1, 2                    | 98 | 53,8 | 65 | 52,4 | 1                  |      | 1                  |      |
|                       | 3                          | 84 | 46,2 | 59 | 47,6 | 1.02 (0.71 – 1.46) | 0.92 | 1.01 (0.70 – 1.46) | 0.97 |
| <b>P53 / TP53</b>     | Otherwise                  | 89 | 66,9 | 70 | 72,2 | 1                  |      | 1                  |      |
|                       | P53 = 3 and TP53 = mutated | 44 | 33,1 | 27 | 27,8 | 0.84 (0.54 – 1.32) | 0.46 | 0.93 (0.59 – 1.47) | 0.74 |

Supplementary Figures

Figure S1 Patterns of mutations, broken down by type of base substitution.

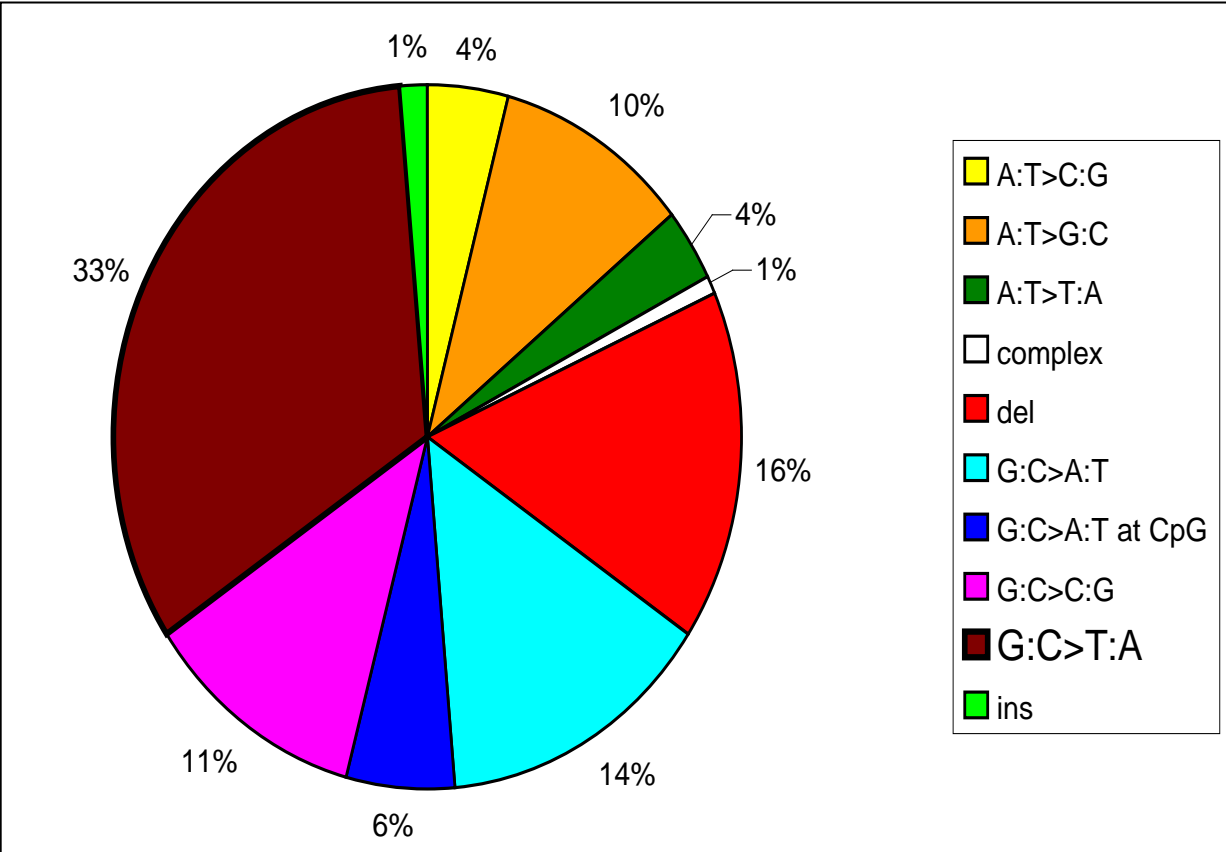

Supplement: supplementary_tables-figures.pdf [file supplementary_tables-figures.pdf]
